# Supplementary material for: New Design for Rapid Prototyping of Digital Master Casts for Multiple Dental Implant Restorations
Source: PubMed Central journal article supplement (PMC4687924; doi:10.1371/journal.pone.0145253), 2015-12-22
Supplement: pone.0145253.s001.pdf [file pone.0145253.s001.pdf]

Madrid, June 30<sup>th</sup>, 2015

Adrián Hernández Gutiérrez  
CEO - PIC Dental  
Email: [adrian.hernandez@picdental.com](mailto:adrian.hernandez@picdental.com)  
T: +34 916 396 014  
W: [www.picdental.com](http://www.picdental.com)

To Whom It May Concern:

*Adrián Hernández Gutiérrez, as CEO of the IDITEC NORTH WEST S.L., I state that:*

*Researchers, L. Romero, M. Jimenez, M. M. Espinosa and M. Dominguez, authors of the article "New design for rapid prototyping of digital master casts for multiple dental implant restorations", have conducted in our Dental Prosthesis Laboratory, different tests to demonstrate the functionality of the digital master model in edentulous and partially edentulous patients of different dental clinics.*

*The tests have shown that the use of the master model built digitally (with the right materials) for the preparation of the different prostheses types, ensures a decrease in costs and an increased accuracy in the mouth and, therefore, the patient's and professionals satisfaction.*

*Below are pictures of some of the tests performed. Currently, the digital model proposed research, is being used in our laboratory as a reference master model. During 2014 more than 80 clinical cases were undertaken successfully with these types of master models and approved by dental technicians and clinics.*

*Should you need any further information about these tests, please feel free to contact me.*



Adrián Hernández Gutiérrez  
CEO PIC Dental

**REAL CASES OF DIGITAL MASTER CASTS FOR  
MULTIPLE DENTAL IMPLANT RESTORATIONS**

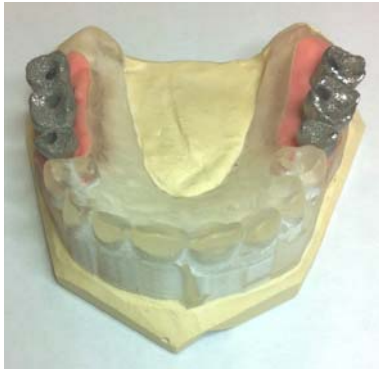

*Test n° 1. Master cast for chrome cobalt  
implant bridges*

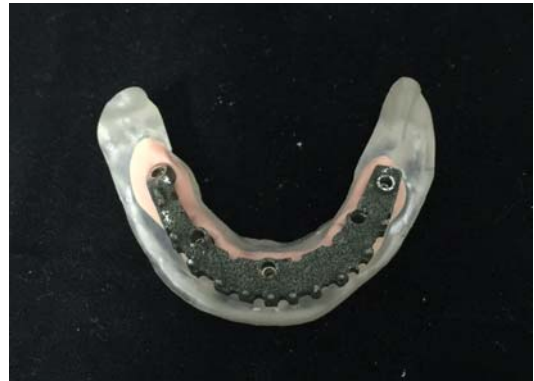

*Test n° 2. Master cast for screw-  
retained hybrid bar*

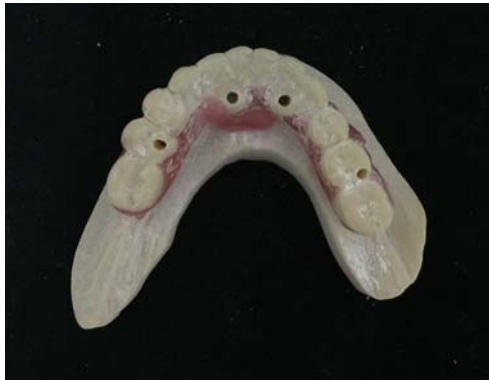

*Test n° 3. Master cast for provisional rapid  
prototyping make-up*

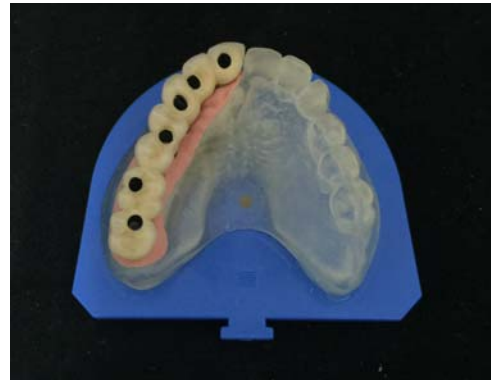

*Test n° 4. Master cast for seven units  
metal ceramic bridge*

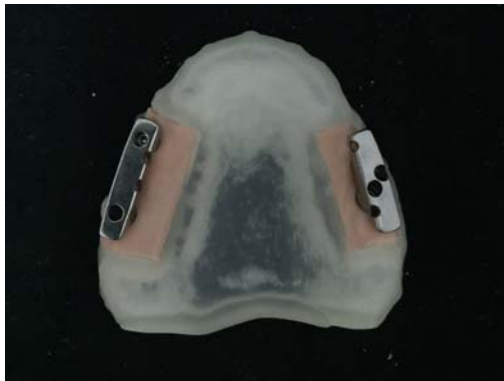

*Test n° 5. Master cast for titanium bars  
for an overdenture*

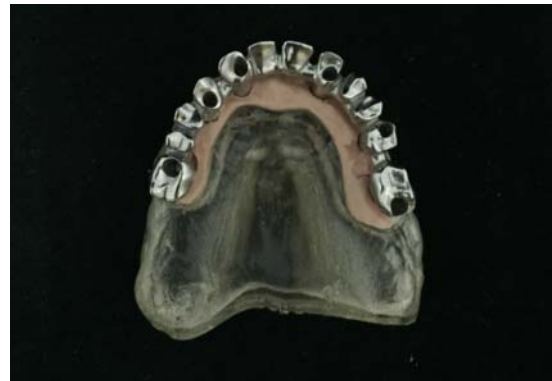

*Test n° 6. Master cast for milled chrome  
cobalt full arch structure*

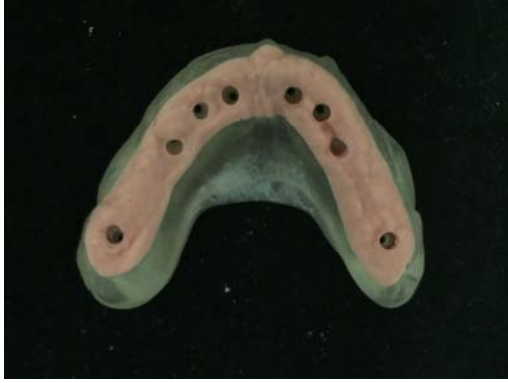

*Test n° 7. Master cast for false gingiva material detailed*

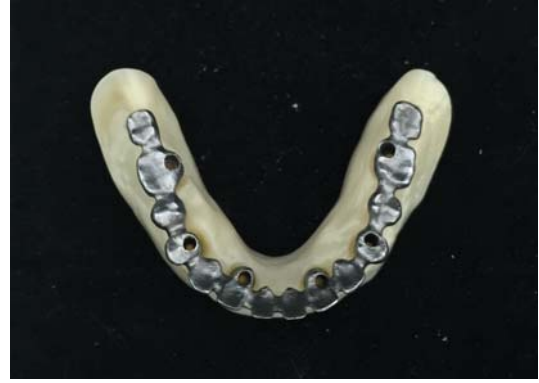

*Test n° 8. Master cast for laser sintering chrome cobalt of full arch structure*

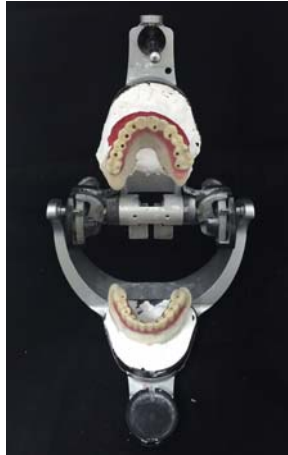

*Test n° 9. Master cast assembly on a semi-adjustable articulator for fixed screw-retained restorations (TMJ movements simulation)*

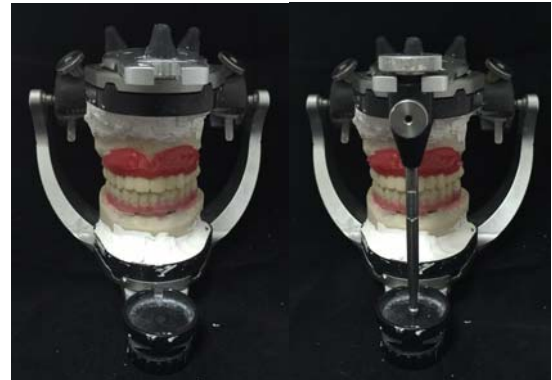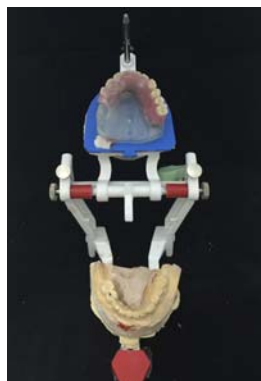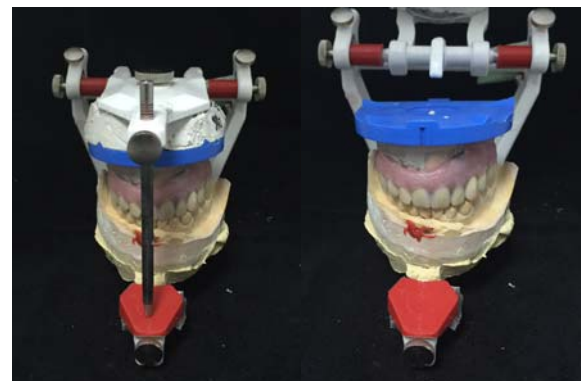

*Test n° 10. Master cast assembly on a non adjustable articulator for fixed screw-retained restorations (open-close bite simulation)*
